# Supplementary material for: Reversible Streptamer Technology Facilitates the Selection of T Regulatory Cells From Cryopreserved Cord Blood
Source: Research Square preprint supplement (doi:10.21203/rs.3.rs-1295146/v1), 2022-03-02
Supplement: Supplementary file 1 [file b06ce598b5941fb9c60e7190.xlsx]

## Sheet: Raw expansion data
2016-03-11	line1		Days in culture						restim																								fold expansion										Cumalitive fold
Day			0	7	12	wells	wells post 12	remaining	wells seeded	total	13	wells	13 left wells		total	21																	0	7	12	13	21						0	7	12	13	21
CD25+	1/15	Dynal	0.3	2.36	9.36	18	15	7.8	9	0.9	2.12	6	9	3.18	5.3	13.6																	1	7.86667	10.4	0.679487	4.27673						1	7.86667	81.8133	55.5911	237.748
CD25+	1/35	Dynal	0.2	1.4	10.56	22	19	9.88	11	1.1	3.56	5	14	9.968	13.528	17																	1	7	9.6	1.36923	1.70546						1	7	67.2	92.0123	156.923
CD25+	1/15	Exp	0.2	1.16	15.36	24	22	11.44	12	1.2	1.52	4	18	6.84	8.36	13.8																	1	5.8	12.8	0.730769	2.01754						1	5.8	74.24	54.2523	109.456
CD25-	1/15	Dynal	0.3	2.48	3				5	0.5	2.44	5	3	1.464	3.904	9.3																	1	8.26667	6	7.808	6.35246						1	8.26667	64.5461	410.027
CD25-	1/35	Dynal	0.3	3.44	3.9				5	0.5	0.76	4	2	0.38	1.14	4.08																	1	11.4667	7.8	2.28	10.7368						1	11.4667	26.144	280.704
CD25-	1/15	Exp	0.3	1.52	5.1				5	0.5	0.6	4	4	0.6	1.2	9.28																	1	5.06667	10.2	2.4	15.4667						1	5.06667	12.16	188.075
2016-04-08	line2
Day			0	7	12		13	14	seed day7			21																					0	7	12	21							0	7	12	21
CD25+	1/15	Dynal	0.1	0.44	1.59	9	3	1	4	0.443	5	0.558																					1	4.4	3.58916	0.350943							1	4.4	15.7923	5.54221
CD25+	1/35	Dynal	0.075	0.12	0.524	2	1	0.5	1	0.074	1	0.117																					1	1.6	7.08108	0.223282							1	1.6	11.3297	2.52973
CD25+	1/15	Exp	0.1	0.42	2.6	13	3	1	3	0.345	10	2.212																					1	4.2	7.53623	0.850769							1	4.2	31.6522	26.9287
CD25-	1/15	Dynal	0.3	2.44	10																												1	8.13333	4.09836								1	8.13333	33.3333
CD25-	1/35	Dynal	0.3	2.24	6.48																												1	7.46667	2.89286								1	7.46667	21.6
CD25-	1/15	Exp	0.3	2.12	9.35																												1	7.06667	4.41038								1	7.06667	31.1667
													d21= more accurate count
2016-04-28	line 3						wells used facs day 12	remaining	13	used	post day13	20	21																				0	7	12	13	21						0	7	12	13	21
CD25+	1/15	Dynal	0.1	0.98	3.42	0.6	1.5	2.9925	6.72	3	5.76	31	19.6																				1	9.8	5.7	2.24561	3.40278						1	9.8	55.86	125.44	426.844
CD25-	1/15	Dynal	0.3	3.7	10.56	1.988		10.56	14.96	4	14.28	61.2	74.4																				1	12.3333	5.31187	1.41667	5.21008						1	12.3333	65.5131	92.8102	483.549
2016-05-06	line 4					seeded	post day 12	13					21																														0	7	12	13	21
CD25+	1/15	Dynal	0.1	0.84	4.35	0.51	3.915	5.925	5	0.51			13.44																				1	8.4	8.52941	1.51341	2.26835						1	8.4	71.6471	108.431	245.961
CD25+	1/35	Dynal	0.084	0.68	3.64	0.36	3.185	2.71333	4	0.36			11.88																				1	8.09524	10.1111	0.85191	4.37838						1	8.09524	81.8519	69.7304	305.306
CD25+	1/15	Exp	0.1	0.68	6.18	0.58	5.665	7.37	6	0.58			15																				1	6.8	10.6552	1.30097	2.03528						1	6.8	72.4552	94.2621	191.85
CD25-	1/15	Dynal	0.3	2.64	6.1	1	5.795	11.47	10	1			40																				1	8.8	6.1	1.97929	3.48736						1	8.8	53.68	106.248	370.526
CD25-	1/35	Dynal	0.3	3.25	7.9	1	7.505	11.84	10	1			24.5333																				1	10.8333	7.9	1.57761	2.07207						1	10.8333	85.5833	135.018	279.766
CD25-	1/15	Exp	0.3	4.6	8	1	6.4	10.56	10	1			33.6																				1	15.3333	8	1.65	3.18182						1	15.3333	122.667	202.4	644
										14		14		15	14-15	15			wells	cells/well	cells	wells	cells/well	cells				pstfacs
2016-09-15	pre-clinical1		0	7	12	14		post beads	seeded	Assay	post assay	wells	pst assay			pst facs	pre	pst	18	18	18	20	20	20	21	cells/well	21	21					0	7	12	14	15	18	20	21			0	7	12	14	15	18	20
CD25+	1/15	Dynal	0.3	2.28	7.872	9.216	6	1.8	1.2	0.96	8.256	48	43	39	4	0.421333	18.1173	16.432	144	0.144	20.736	144	0.108	15.552	144	0.0966667	13.92						1	7.6	6.56	1.17073	1.96586	1.26193	0.75	0.895062			1	7.6	49.856	58.368	114.743	144.798	108.598
CD25+	1/15	Expander	0.3	1.8564	2.7456	3.072	6	0.8268	0.6	0.512	2.56	24	20	16	4	0.1792	3.584	2.8672	32	0.264	8.448	64	0.081	5.184	64	0.146667	9.38667						1	6.188	4.576	1.11888	1.16667	2.94643	0.613636	1.8107			1	6.188	28.3163	31.6826	36.963	108.909	66.8304
CD25-	1/15	Dynal	0.6	1.84		9.5232	12	2.3	1.2	0.992	8.5312	48	43	37	6	0.312	13.416	11.544															1	3.06667		7.936							1	3.06667		24.3371
CD25-	1/15	Expander	0.6	2.04		7.9104	12	2.26	1.2	0.9888	6.9216	48	42	38	4	0.277333	11.648	10.5387															1	3.4		6.592							1	3.4		22.4128
2016-10-14	pre-clinical 2		0	6	7	7(seeded)	13	14	20	left	21																						0	6	7	13	14	20	21				0	6	7	13	14	20	21
CD25+	1/15	Dynal	0.2	1.5696	2.56	1.6	16	19.548	24.96	23.68	49.7																						1	7.848	1.63099	10	1.22175	1.27686	2.09882				1	7.848	12.8	128	156.384	199.68	419.092
CD25+	1/15	Expander	0.2	0.936	1.34	0.8	7.52	8.2432	15.64	14.72	22.2																						1	4.68	1.43162	9.4	1.09617	1.89732	1.50815				1	4.68	6.7	62.98	69.0368	130.985	197.545
																																		7
CD25-	1/15	Dynal	0.8			1.6	13.2267	15.8688																									1	0	8.26667	1.19976							1	0		0
CD25-	1/15	Expander	0.6			1.6	4.90667	20.4624																									1	0	3.06667	4.17033							1	0		0
2016-11-15	preclinical3		0	7		seeded	14	post sup	post facs	17	19	21	post assess	22																			0	7	14	17	19	22					0	7	14	17	19	21
CD25+	1/15	Dynal	0.08	0.72		0.7	8.736	7.488	7.02	21.15	18.9	13.68	12.912	24.3																			1	9	12.48	3.01282	0.893617	1.28571					1	9	112.32	338.4	302.4	388.8
CD25+	1/15	Expander	0.08	0.66		0.36	4.544	3.408	3.195	7.812	10.08	9.66	8.29	13.224																			1	8.25	12.6222	2.44507	1.29032	1.3119					1	8.25	104.133	254.613	328.533	431.004
CD25-	1/15	Dynal	0.3	2.36		0.8	8.544																										1	7.86667	10.68								1	7.86667	84.016
CD25-	1/15	Expander	0.3	1.96		0.8	8.512																										1	6.53333	10.64								1	6.53333	69.5147
									*
2016-11-25	preclinical4		0	5	7	seeded	13	after FACS	17	18	after FACS	19	20	pst assay	21	22																	0	5	7	13	17	18	19	20	21	22	0	5	7	13	17	18	19
									76	152	148	148	224	197	197	18mls
									46	92	87	87	133	109	109	9mls
CD25+	1/15	Dynal	0.3	0.792	2.21	1.1	9.9792	9.2988	43.472	41.9976	40.8924	56.4768	56.4148	49.6148	62.9415	93.6																	1	2.64	2.7904	9.072	4.67501	0.966084	1.38111	0.998902	1.2686	1.4871	1	2.64	7.36667	66.8304	312.433	301.836	416.869
CD25+	1/15	Expander	0.2	0.548	1.14	0.7	7.6608	6.84	21.114	16.5701	15.6696	28.7361	29.0938	23.8438	35.8065	30.6																	1	2.74	2.08029	10.944	4.20118	1.01245	1.83388	1.01245	1.50171	0.854593	1	2.74	5.7	62.3808	262.073	265.335	486.592
CD25-	1/15	Dynal	0.3	1.692	3.168	0.8	3.2256																										1	5.64	1.87234	4.032							1	5.64	10.56	42.5779
CD25-	1/15	Expander	0.3	1.98	3.476	0.8	2.0736																										1	6.6	1.75556	2.592							1	6.6	11.5867	30.0326
Suppression data		% INHIBITION
day 13	1/15	Dynal
CD25+		2:1	1:1	1:2	1:4	CD25-	2:1	1:4
	2016-03-11	45.8765	45.7188	40.5137	30.6895		45.2456	12.6183
	2016-04-08	47.2913	41.2046	32.5685	23.7094		23.9643	-9.56023
	2016-04-28	69.1877	70.9034	63.5154	55.6022		4.7619	-26.5406
	2016-05-06
CD25+	1/35	Dynal
	2016-03-11	46.5525	42.9022	35.5115	33.1681		33.8441	12.393
	2016-04-08	52.0076	40.0892	32.2498	16.5711		25.6214	-17.5271
	2016-05-06
CD25+	1/15	Expander
	2016-03-11	39.7026	37.0662	35.9621	25.3267		21.0906	1.0365
	2016-04-08	51.8164	48.9484	44.6781	27.8521		32.1224	-13.2569
	2016-05-06
		20
		wells	cells	cells/well	total	left
20	CD25+D	234	1.28	0.106667	24.96	23.68
21		222	48	0.224299	49.7944
										234			24
20	CD25+Ex	204	0.92	0.0766667	15.64	14.72							32
21		192	21.28	0.115652	22.2052								16
				24									16
				32									24
				16									44
				16									16
				96									28
				184									14
													214
[truncated: 3 more columns]

## Sheet: fold and cumlative expansion
			CD25+	Dynal	0	1	2	3
			1	2016-03-11	1	7.86667	7.06667	4.27673
			2	2016-04-08	1	4.4	3.58916	0.350943
			3	2016-04-28	1	9.8	12.8	3.40278
			4	2016-05-06	1	8.4	12.9085	2.26835
				preclin1	1	7.6	6.56	1.94966
				preclin2	1	12.8	10	3.27416
				preclin3	1	9	12.48	3.46154
				Preclin4	1	7.36667	9.072	7.90449
				AVG	1	8.40417	9.30954	3.36108
				SD	0	2.38064	3.40239	2.19569
		Cumalitve growth
		CD25+		Dynal	0	1	2	3
				2016-03-11	1	7.86667	55.5911	237.748
				2016-04-08	1	4.4	15.7923	5.54221
				2016-04-28	1	9.8	125.44	426.844
				2016-05-06	1	8.4	108.431	245.961
				preclin1	1	7.6	49.856	97.2021
				preclin2	1	12.8	128	419.092
				preclin3	1	9	112.32	388.8
				Preclin4	1	7.36667	66.8304	528.26
				AVG	1	8.40417	82.7827	293.681
				SD	0	2.38064	41.3354	179.113

## Sheet: Suppressive function
																																																	suppression assay
	CD25+ 1/15 Dynal										CD25+ 1/15 Dynal
	2 weeks	line1	line2	line3	line4	preclin1	preclin2	preclin3	preclin4		3 weeks	line1	line2	line3	line4	preclin1	preclin2	preclin3	preclin4
	2:1	45.8765	47.2913	69.1877		74.5026	72.2942	72.2348	64.2937		2:1				48.2353	64.3168	72.801	74.2492	70.5566
	1:1	45.7188	41.2046	70.9034		61.9749	65.4618	70	60.5395		1:1				44.1457	52.5592	65.2209	55.8676	62.6346
	1:2	40.5137	32.5685	63.5154		55.1953	51.4417	61.3544	50.4449		1:2				28.7395	38.5804	49.8176	45.0501	47.8905
	1:4	30.6895	23.7094	55.6022		43.4783	41.1199	51.8736	34.8721		1:4				18.4314	26.6538	47.6287	40.6007	40.4399										%response	%inhibition	Ratio						%response	%inhibition	Ratio						%response	%inhibition	Ratio
																								Line4	week3	Treg:10k eff	30	Treg:eff 10k (2:1)	51.7647	48.2353	2	Preclin1	week3	Treg:10k eff	30	Treg:eff 10k (2:1)	35.6832	64.3168	2	Preclin2	week3	Treg:10k eff	30	Treg:eff 10k (2:1)	27.199	72.801	2
	CD25+ 1/35 Dynal										CD25+ 1/35 Dynal														2016-05-27	CD25+ F0(1000) 1in15	20	Treg:eff 10k (1:1)	55.8543	44.1457	1		2016-10-12	CD25+ F0(1000) Dynal	20	Treg:eff 10k (1:1)	47.4408	52.5592	1		2016-11-03	CD25+ F0(1000) Dynal	20	Treg:eff 10k (1:1)	34.7791	65.2209	1		Preclin3
	2 weeks	line1									3 weeks																15	Treg:eff 10k (1:2)	71.2605	28.7395	0.5				15	Treg:eff 10k (1:2)	61.4196	38.5804	0.5				15	Treg:eff 10k (1:2)	50.1824	49.8176	0.5
	2:1	46.5525	52.0076								2:1				43.3613												12.5	Treg:eff 10k (1:4)	81.5686	18.4314	0.25				12.5	Treg:eff 10k (1:4)	73.3462	26.6538	0.25				12.5	Treg:eff 10k (1:4)	52.3713	47.6287	0.25
	1:1	42.9022	40.0892								1:1				43.1373											Treg:10k eff	30	Treg:eff 20k (2:1)	56.6387	43.3613	2			Treg:10k eff	30	Treg:eff 20k (2:1)	22.6461	77.3539	2			Treg:10k eff	30	Treg:eff 20k (2:1)	29.7933	70.2067	2
	1:2	35.5115	32.2498								1:2				29.0196											CD25+ F0(1000) 1in35	20	Treg:eff 20k (1:1)	56.8627	43.1373	1			CD25+ F0(1000) Ex	20	Treg:eff 20k (1:1)	33.1724	66.8276	1			CD25+ F0(1000) Ex	20	Treg:eff 20k (1:1)	35.3871	64.6129	1
	1:4	33.1681	16.5711								1:4				19.0476												15	Treg:eff 20k (1:2)	70.9804	29.0196	0.5				15	Treg:eff 20k (1:2)	51.4244	48.5756	0.5				15	Treg:eff 20k (1:2)	46.21	53.79	0.5
																											12.5	Treg:eff 20k (1:4)	80.9524	19.0476	0.25				12.5	Treg:eff 20k (1:4)	69.5316	30.4684	0.25				12.5	Treg:eff 20k (1:4)	64.0454	35.9546	0.25
	CD25+ 1/15 expander										CD25+ 1/15 expander															Treg:10k eff	30	Treg:eff 20k (2:1)	64.4258	35.5742	2
	2 weeks	line1									3 weeks															CD25+ F0(1000) 1in15 ex	20	Treg:eff 20k (1:1)	63.9496	36.0504	1			Treg:10k eff	30	Treg:eff 10k (2:1)	101.738	-1.73829	2			Treg:10k eff	30	Treg:eff 10k (2:1)	51.8849	48.1151	2
	2:1	39.7026	51.8164			64.0383	58.8383	54.3567	54.2825		2:1				35.5742	77.3539	70.2067	60.901	69.3447								15	Treg:eff 20k (1:2)	77.0868	22.9132	0.5			CD25- F0(1000) Ex	12.5	Treg:eff 10k (1:4)	126.799	-26.7986	0.25			CD25- F0(1000) Ex	12.5	Treg:eff 10k (1:4)	79.6109	20.3891	0.25
	1:1	37.0662	48.9484			49.3736	52.0267	49.5711	55.7286		1:1				36.0504	66.8276	64.6129	56.8966	60.772								12.5	Treg:eff 20k (1:4)	80.8964	19.1036	0.25			Treg:10k eff	30	Treg:eff 10k (2:1)	97.4891	2.51086	2			Treg:10k eff	30	Treg:eff 10k (2:1)	51.8038	48.1962	2
	1:2	35.9621	44.6781			45.0995	50.982	50.6546	44.4383		1:2				22.9132	48.5756	53.79	43.7709	50															CD25- F0(1000) 1in15 ex	12.5	Treg:eff 10k (1:4)	126.702	-26.7021	0.25			CD25- F0(1000) 1in15 ex	12.5	Treg:eff 10k (1:4)	79.165	20.835	0.25
	1:4	25.3267	27.8521			40.3832	44.4212	42.0316	47.2191		1:4				19.1036	30.4684	35.9546	43.5484	37.1634							Treg:10k eff	30	Treg:eff 10k (2:1)	102.409	-2.40896	2
																										CD25- F0(1000) 1in15	12.5	Treg:eff 10k (1:4)	104.762	-4.7619	0.25
																										Treg:10k eff	30	Treg:eff 10k (2:1)	95.7983	4.20168	2
																										CD25- F0(1000) 1in35	12.5	Treg:eff 10k (1:4)	110.252	-10.2521	0.25
																										Treg:10k eff	30	Treg:eff 10k (2:1)	90.9804	9.01961	2
																										CD25- F0(1000) 1in15 ex	12.5	Treg:eff 10k (1:4)	100.952	-0.952381	0.25
																																					%response	%inhibition	Ratio						%response	%inhibition	Ratio
					%response	%inhibition	Ratio						%response	%inhibition	Ratio						%response	%inhibition	Ratio									Preclin1	week2	Treg:10k eff	30	Treg:eff 10k (2:1)	25.4974	74.5026	2	Preclin2	week2	Treg:10k eff	30	Treg:eff 10k (2:1)	27.7058	72.2942	2		Preclin3
Line1	week2	Treg:10k eff	30	Treg:eff 10k (2:1)	54.1235	45.8765	2	Line2	week2	Treg:10k eff	30	Treg:eff 10k (2:1)	52.7087	47.2913	2	Line3	week2	Treg:10k eff	30	Treg:eff 10k (2:1)	30.8123	69.1877	2										2016-10-04	CD25+ F0(1000) Dynal	20	Treg:eff 10k (1:1)	38.0251	61.9749	1		2016-10-27	CD25+ F0(1000) Dynal	20	Treg:eff 10k (1:1)	34.5382	65.4618	1
	2016-03-24	CD25+ F0(1000) 1in15	20	Treg:eff 10k (1:1)	54.2812	45.7188	1		2016-04-21	CD25+ F0(1000) 1in15	20	Treg:eff 10k (1:1)	58.7954	41.2046	1		2016-05-11	CD25+ F0(1000) 1in15	20	Treg:eff 10k (1:1)	29.0966	70.9034	1												15	Treg:eff 10k (1:2)	44.8047	55.1953	0.5				15	Treg:eff 10k (1:2)	48.5583	51.4417	0.5
			15	Treg:eff 10k (1:2)	59.4863	40.5137	0.5				15	Treg:eff 10k (1:2)	67.4315	32.5685	0.5				15	Treg:eff 10k (1:2)	36.4846	63.5154	0.5												12.5	Treg:eff 10k (1:4)	56.5217	43.4783	0.25				12.5	Treg:eff 10k (1:4)	58.8801	41.1199	0.25
			12.5	Treg:eff 10k (1:4)	69.3105	30.6895	0.25				12.5	Treg:eff 10k (1:4)	76.2906	23.7094	0.25				12.5	Treg:eff 10k (1:4)	44.3978	55.6022	0.25											Treg:10k eff	30	Treg:eff 20k (2:1)	35.9617	64.0383	2			Treg:10k eff	30	Treg:eff 20k (2:1)	41.1617	58.8383	2
		Treg:10k eff	30	Treg:eff 20k (2:1)	53.4475	46.5525	2			Treg:10k eff	30	Treg:eff 20k (2:1)	47.9924	52.0076	2			Treg:10k eff	30	Treg:eff 20k (2:1)														CD25+ F0(1000) Ex	20	Treg:eff 20k (1:1)	50.6264	49.3736	1			CD25+ F0(1000) Ex	20	Treg:eff 20k (1:1)	47.9733	52.0267	1
		CD25+ F0(1000) 1in35	20	Treg:eff 20k (1:1)	57.0978	42.9022	1			CD25+ F0(1000) 1in35	20	Treg:eff 20k (1:1)	59.9108	40.0892	1			CD25+ F0(1000) 1in35	20	Treg:eff 20k (1:1)															15	Treg:eff 20k (1:2)	54.9005	45.0995	0.5				15	Treg:eff 20k (1:2)	49.018	50.982	0.5
			15	Treg:eff 20k (1:2)	64.4885	35.5115	0.5				15	Treg:eff 20k (1:2)	67.7502	32.2498	0.5				15	Treg:eff 20k (1:2)															12.5	Treg:eff 20k (1:4)	59.6168	40.3832	0.25				12.5	Treg:eff 20k (1:4)	55.5788	44.4212	0.25
			12.5	Treg:eff 20k (1:4)	66.8319	33.1681	0.25				12.5	Treg:eff 20k (1:4)	83.4289	16.5711	0.25				12.5	Treg:eff 20k (1:4)
		Treg:10k eff	30	Treg:eff 20k (2:1)	60.2974	39.7026	2			Treg:10k eff	30	Treg:eff 20k (2:1)	48.1836	51.8164	2			Treg:10k eff	30	Treg:eff 20k (2:1)														Treg:10k eff	30	Treg:eff 10k (2:1)	171.85	-71.8497	2			Treg:10k eff	30	Treg:eff 10k (2:1)	71.0405	28.9595	2
		CD25+ F0(1000) 1in15 ex	20	Treg:eff 20k (1:1)	62.9338	37.0662	1			CD25+ F0(1000) 1in15 ex	20	Treg:eff 20k (1:1)	51.0516	48.9484	1			CD25+ F0(1000) 1in15 ex	20	Treg:eff 20k (1:1)														CD25- F0(1000) Ex	12.5	Treg:eff 10k (1:4)	186.072	-86.0722	0.25			CD25- F0(1000) Ex	12.5	Treg:eff 10k (1:4)	89.1768	10.8232	0.25
			15	Treg:eff 20k (1:2)	64.0379	35.9621	0.5				15	Treg:eff 20k (1:2)	55.3219	44.6781	0.5				15	Treg:eff 20k (1:2)														Treg:10k eff	30	Treg:eff 10k (2:1)	185.409	-85.409	2			Treg:10k eff	30	Treg:eff 10k (2:1)	88.8007	11.1993	2
			12.5	Treg:eff 20k (1:4)	74.6733	25.3267	0.25				12.5	Treg:eff 20k (1:4)	72.1479	27.8521	0.25				12.5	Treg:eff 20k (1:4)														CD25- F0(1000) 1in15 ex	12.5	Treg:eff 10k (1:4)	190.641	-90.6411	0.25			CD25- F0(1000) 1in15 ex	12.5	Treg:eff 10k (1:4)	89.6364	10.3636	0.25
		Treg:10k eff	30	Treg:eff 10k (2:1)	54.7544	45.2456	2			Treg:10k eff	30	Treg:eff 10k (2:1)	76.0357	23.9643	2			Treg:10k eff	30	Treg:eff 10k (2:1)	95.2381	4.7619	2
		CD25- F0(1000) 1in15	12.5	Treg:eff 10k (1:4)	87.3817	12.6183	0.25			CD25- F0(1000) 1in15	12.5	Treg:eff 10k (1:4)	109.56	-9.56023	0.25			CD25- F0(1000) 1in15	12.5	Treg:eff 10k (1:4)	126.541	-26.5406	0.25
		Treg:10k eff	30	Treg:eff 10k (2:1)	66.1559	33.8441	2			Treg:10k eff	30	Treg:eff 10k (2:1)	74.3786	25.6214	2			Treg:10k eff	30	Treg:eff 10k (2:1)
		CD25- F0(1000) 1in35	12.5	Treg:eff 10k (1:4)	87.607	12.393	0.25			CD25- F0(1000) 1in35	12.5	Treg:eff 10k (1:4)	117.527	-17.5271	0.25			CD25- F0(1000) 1in35	12.5	Treg:eff 10k (1:4)
		Treg:10k eff	30	Treg:eff 10k (2:1)	78.9094	21.0906	2			Treg:10k eff	30	Treg:eff 10k (2:1)	67.8776	32.1224	2			Treg:10k eff	30	Treg:eff 10k (2:1)
		CD25- F0(1000) 1in15 ex	12.5	Treg:eff 10k (1:4)	98.9635	1.0365	0.25			CD25- F0(1000) 1in15 ex	12.5	Treg:eff 10k (1:4)	113.257	-13.2569	0.25			CD25- F0(1000) 1in15 ex	12.5	Treg:eff 10k (1:4)
																																																	Preclin3

	CD25- 1/15 Dynal										CD25- 1/15 Dynal
	2 weeks	line1	line2	line3	line4	preclin1	preclin2	preclin3	preclin4		3 weeks	line1	line2	line3	line4	preclin1	preclin2	preclin3	preclin4
	2:1	45.2456	23.9643	4.7619		-71.8497	28.9595	44.4244	19.911		2:1				-2.40896	-1.73829	48.1151	27.4194	4.12926
	1:1										1:1
	1:2										1:2
	1:4	12.6183	-9.56023	-26.5406		-86.0722	10.8232	18.9616	-10.7898		1:4				-4.7619	-26.7986	20.3891	1.72414	-13.1508
	CD25- 1/35 Dynal										CD25- 1/35 Dynal
	2 weeks	line1									3 weeks	line1	line2	line3	line4	preclin1	preclin2	preclin3	preclin4
	2:1	33.8441	25.6214								2:1				4.20168
	1:1										1:1
	1:2										1:2
	1:4	12.393	-17.5271								1:4
															-10.2521
	CD25- 1/15 expander										CD25- 1/15 expander
	2 weeks	line1									3 weeks	line1	line2	line3	line4	preclin1	preclin2	preclin3	preclin4
	2:1	21.0906	32.1224			-85.409	11.1993	34.8533	22.1357		2:1				9.01961	2.51086	48.1962	33.7041	16.9659
	1:1										1:1
	1:2										1:2
	1:4	1.0365	-13.2569			-90.6411	10.3636	16.6591	-0.389321		1:4				-0.952381	-26.7021	20.835	-6.396	-6.68761
[truncated: 15 more columns]
