# Supplementary material for: Reversible Streptamer Technology Facilitates the Selection of T Regulatory Cells From Cryopreserved Cord Blood
Source: Research Square preprint supplement (doi:10.21203/rs.3.rs-1295146/v1), 2022-03-02
Supplement: Supplementary file 2 [file e55a2bcbc3abb7d8d3db695c.docx]

**Supplementary**

**S1 Table antibody panels for phenotypic characterisation of isolated cells**

| Panel 1 | Panel 2 | Panel 3 | Panel 4 |
| --- | --- | --- | --- |
| CD45-PE-CF594 (HI30)✦ | CD45-Alexa Fluro 700✦ | CD45-Alexa Fluro 700✦ | CD45-Alexa Fluro 700✦ |
| CD4-FITC✧ | CD4-FITC✧ | CD4-FITC✧ | CD4-FITC✧ |
| CD127-PE✦ | CD127-PE✦ | CD127-PE✦ | CD127-PE✦ |
| CD25-APC✦ | CD25-APC✦ | CD25-APC✦ | CD25-APC✦ |
| CD3-Alexa fluor 700 (UCHT1)✦ |  | CD3-Pe-Cy7 (SK7)✦ | CD3-Pe-Cy7✦ |
| CD56-PerCP.Cy5.5 (B159)✦ |  |  |  |
| CD19-APC.Cy7 (SJ25C1)✦ |  |  |  |
| DAPI★ *1 | FOXP3-PerCP.Cy5.5* *2 | 7AAD✦ *1 | FOXP3-PerCP.Cy5.5* *2 |

* eBioscience, ThermoFisher, Leicestershire, UK

✦ BD Pharmingen/Biosciences; Berkshire, UK

✧ ImmunoTools, Friesoythe; Germany

★Molecular Probes, ThermoFisher, Leicestershire, UK

*1 post stain, pre-acquisition

*2 intranuclear staining

**S2 Table Antibody panels for characterisation of expanded cells**

| Panel 1 | panel 2 | panel 3 | panel 4 | panel 5 |
| --- | --- | --- | --- | --- |
| Live/dead eFluro 506* *1 | Live/dead eFluro 506* *1 | Live/dead eFluro 506* *1 | Live/dead eFluro 506* *1 | Live/dead eFluro 506* *1 |
| CD4-BV605 (RPA-T4)✦ | CD4-BV605✦ | CD4-BV605✦ | CD4-BV605✦ | CD4-Alexa fluor 700 (RPA-T4)✦ |
| CD127-PE (HIL-7R-M21)✦ | CD127-PE✦ | CD127-FITC (eBioRDR5)* | CD127-PE-Cy7 (HIL-7R-M21)✦ | CD127-BV605 (HIL-7R-M21)✦ |
| CD25-APC (2A3)✦ | CD25-Alexa fluor 700 (M-A251)✦ | CD25-Alexa fluor 700✦ | CD25-APC-Cy7 (M-A251)✦ | CD25-APC-Cy7✦ |
| CD3-APC-Cy7 (SK7)✦ | CD3-APC-Cy7✦ | CD3-Pe-Cy7 (SK7)✦ |  |  |
| CD45-Alexa Fluro 700 (HI30)✦ | CD45-PE-CF594 (HI30)* | CD45-PE-CF594* | CD45-Alexa Fluro 700✦ |  |
| CD197-PE-Cy7 (CCR7; 3D12)✦ | CXCR4-PE-Cy7 (12G5)✦ | PD-1-PE (eBioJ105)* | CD134-PE (OX40; L106) | CCR10-PE (1B5)✦ |
| CD62L-PE-CF594 (DREG-56)✦ | 2B4-APC (eBioDM244)* | CXCR3-APC (IC6/CCXCR3)✦ | CD62L-PE-CF594✦ | CXCR3-APC✦ |
|  |  |  | 41BB-APC (CD137; 4B4-1)✦ | CCR4-PE-CF594 (1G1)✦ |
|  |  |  |  | CCR6-PE.Cy7 (11A9)✦ |
| Helios-Alexa fluor 488 (22F6)✦ *2 |  |  | Helios-Alexa fluor 488✦ *2 | Helios-Alexa fluor 488✦ *2 |
| FOXP3-PerCP.Cy5.5 (PCH101)* *2 | FOXP3-PerCP.Cy5.5* *2 | FOXP3-PerCP.Cy5.5* *2 | FOXP3-PerCP.Cy5.5* *2 | FOXP3-PerCP.Cy5.5* *2 |

* eBioscience, ThermoFisher, Leicestershire, UK

✦ BD Pharmingen/Biosciences; Berkshire, UK

✧ ImmunoTools, Friesoythe; Germany

♢ BioLegend, London, UK

*1 post surface prefixation/permeabilization

*2 intranuclear staining
